# Supplementary material for: Cryo-EM structure of the human somatostatin receptor 2 complex with its agonist somatostatin delineates the ligand-binding specificity
Source: eLife. 2022 Apr 21;11:e76823. doi: 10.7554/eLife.76823 (PMC9054131; doi:10.7554/eLife.76823)
Supplement: Figure 1—figure supplement 1—source data 1. [file elife-76823-fig1-figsupp1-data1.zip]

Archive with 4 entries (4 files):
- Figure1-Supple1-source1_uncroppedGel.jpg
- __MACOSX/._Figure1-Supple1-source1_uncroppedGel.jpg
- Figure1-Supple1-source1_withlabel.pdf
- __MACOSX/._Figure1-Supple1-source1_withlabel.pdf
