# Supplementary material for: Cryo-EM structure of the human somatostatin receptor 2 complex with its agonist somatostatin delineates the ligand-binding specificity
Source: eLife journal article supplement (doi:10.7554/elife.76823), 2022-04-21
Supplement: supp [file elife-76823-supp-v1.zip]

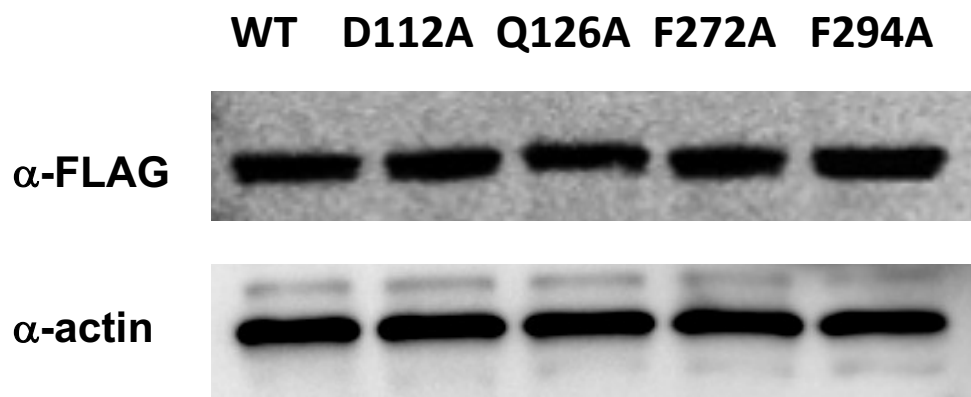

**Figure 2-figure supplement 1. Western blot analysis of SSTR2 expression in HEK293 cells.**

The expression levels of SSTR2 wt and mutants are similar. Actin was used for loading control.
