# Supplementary material for: Cryo-EM structure of the human somatostatin receptor 2 complex with its agonist somatostatin delineates the ligand-binding specificity
Source: eLife journal article supplement (doi:10.7554/elife.76823), 2022-04-21
Supplement: supp [file elife-76823-supp-v1.zip]

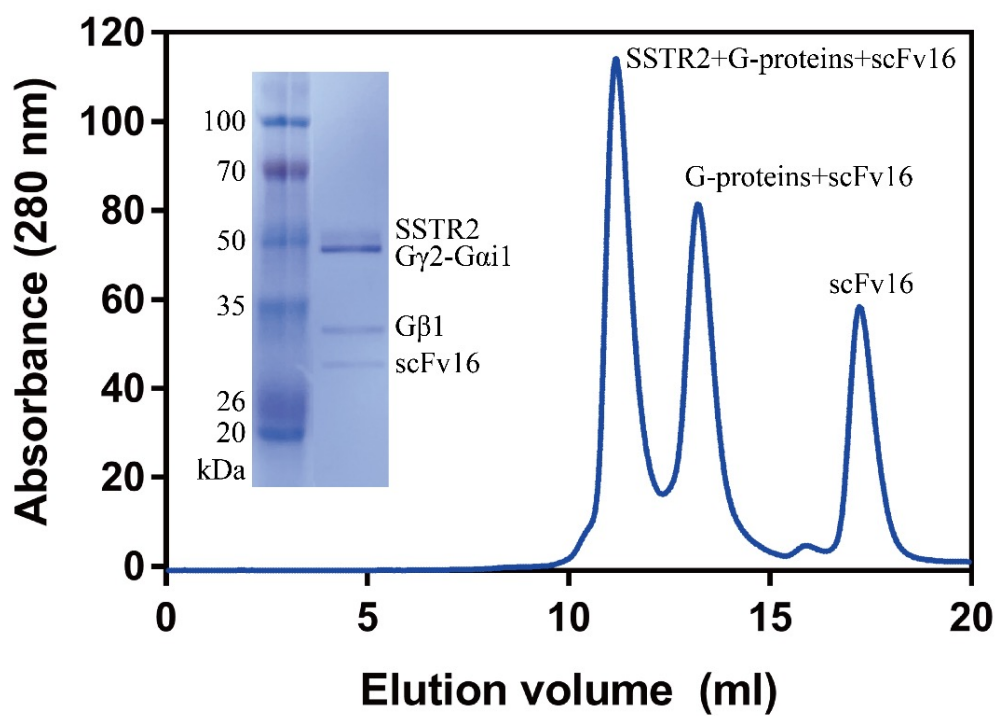

**Figure 1-figure supplement 1. Purification of recombinant human SSTR2-Gαi1/Gβ1γ2-scFv16 complex.**

After injecting the complex sample into a size exclusion chromatography column, three peaks appeared. The complete complex of SSTR2, heterotrimeric Gαi1/Gβ1γ2 and scFv16 was eluted at the first peak around 11.25ml (shown in an SDS-PAGE).
