# Supplementary material for: Cryo-EM structure of the human somatostatin receptor 2 complex with its agonist somatostatin delineates the ligand-binding specificity
Source: eLife journal article supplement (doi:10.7554/elife.76823), 2022-04-21
Supplement: supp [file elife-76823-supp-v1.zip]

**A**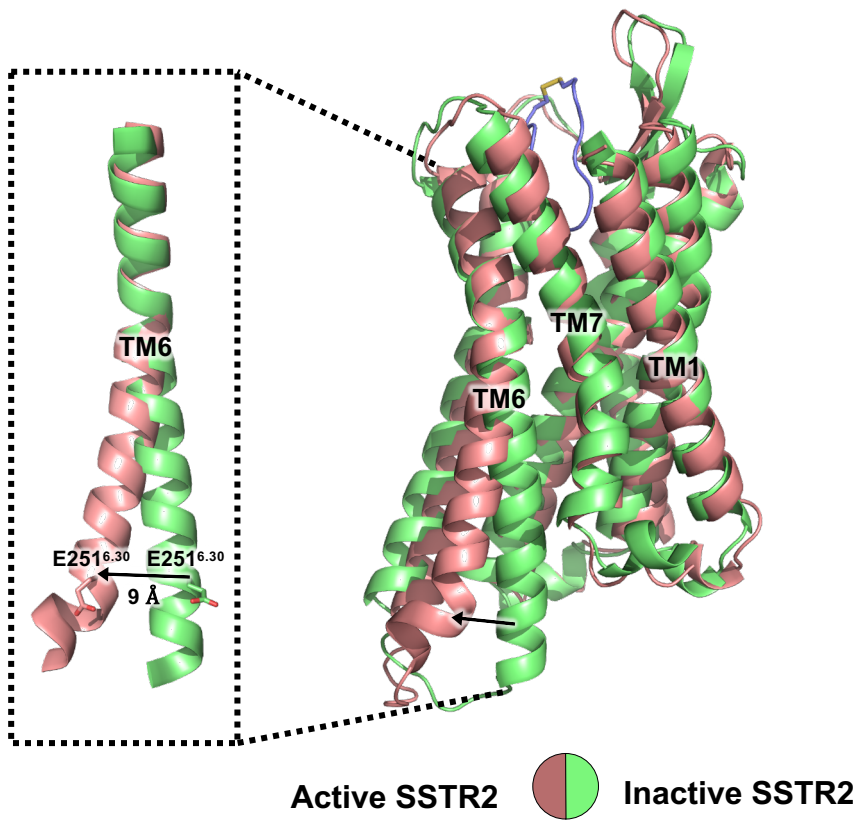**B**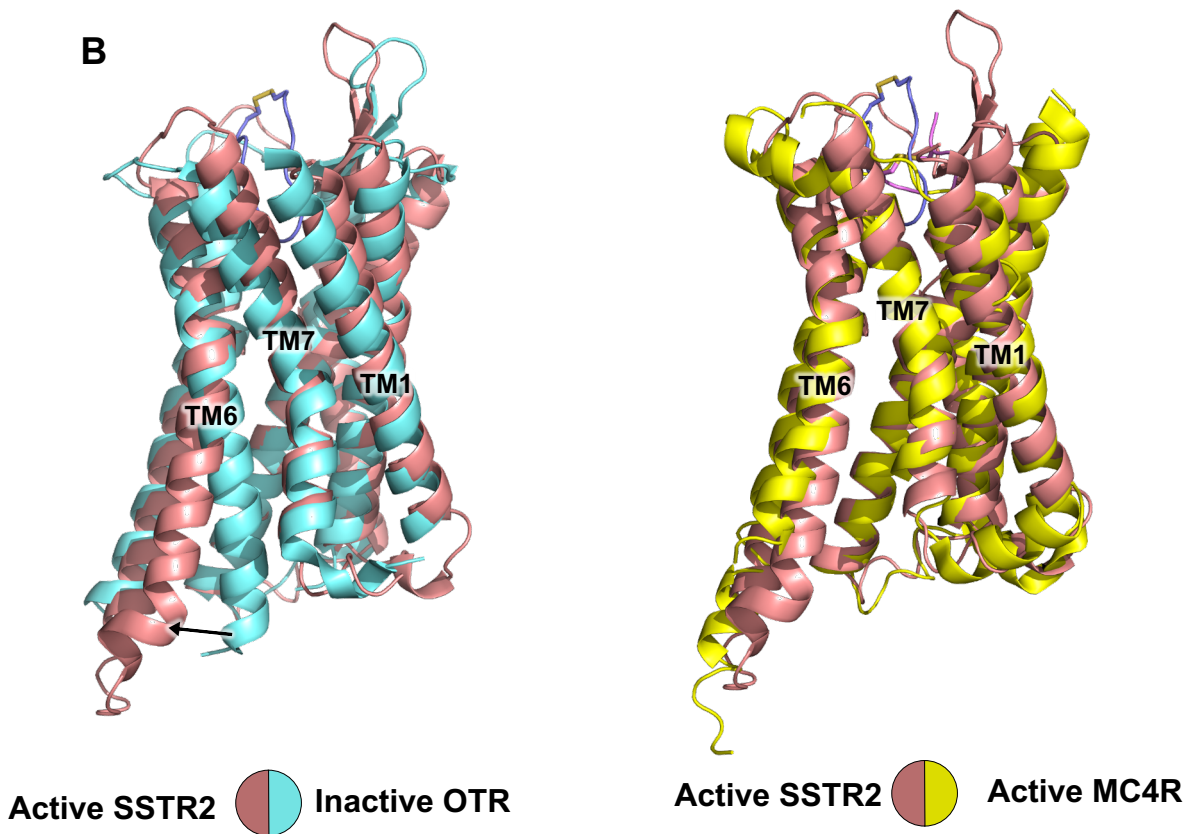

**Figure 1-figure supplement 4. Comparison among SSTR2 and other GPCR structures.**

**(A)** The superimposition of SSTR2 in active and inactive conformations. The active structure of SSTR2 (in salmon) is from this study and the inactive structure of SSTR2 (in green) is predicted by AlphaFold. TM6 is displaced outward in the active form compared with the inactive form.

**(B)** Comparison between SSTR2 and other GPCR structures in active and inactive forms. The active SSTR2 structure (in salmon) is superimposed with the inactive oxytocin receptor (OTR) structure (in cyan) (PDB ID: 6TPK) and with the active melanocortin receptor 4 (MC4R) structure (in yellow) (PDB ID: 7AUE).
