# Supplementary material for: Cryo-EM structure of the human somatostatin receptor 2 complex with its agonist somatostatin delineates the ligand-binding specificity
Source: eLife journal article supplement (doi:10.7554/elife.76823), 2022-04-21
Supplement: supp [file elife-76823-supp-v1.zip]

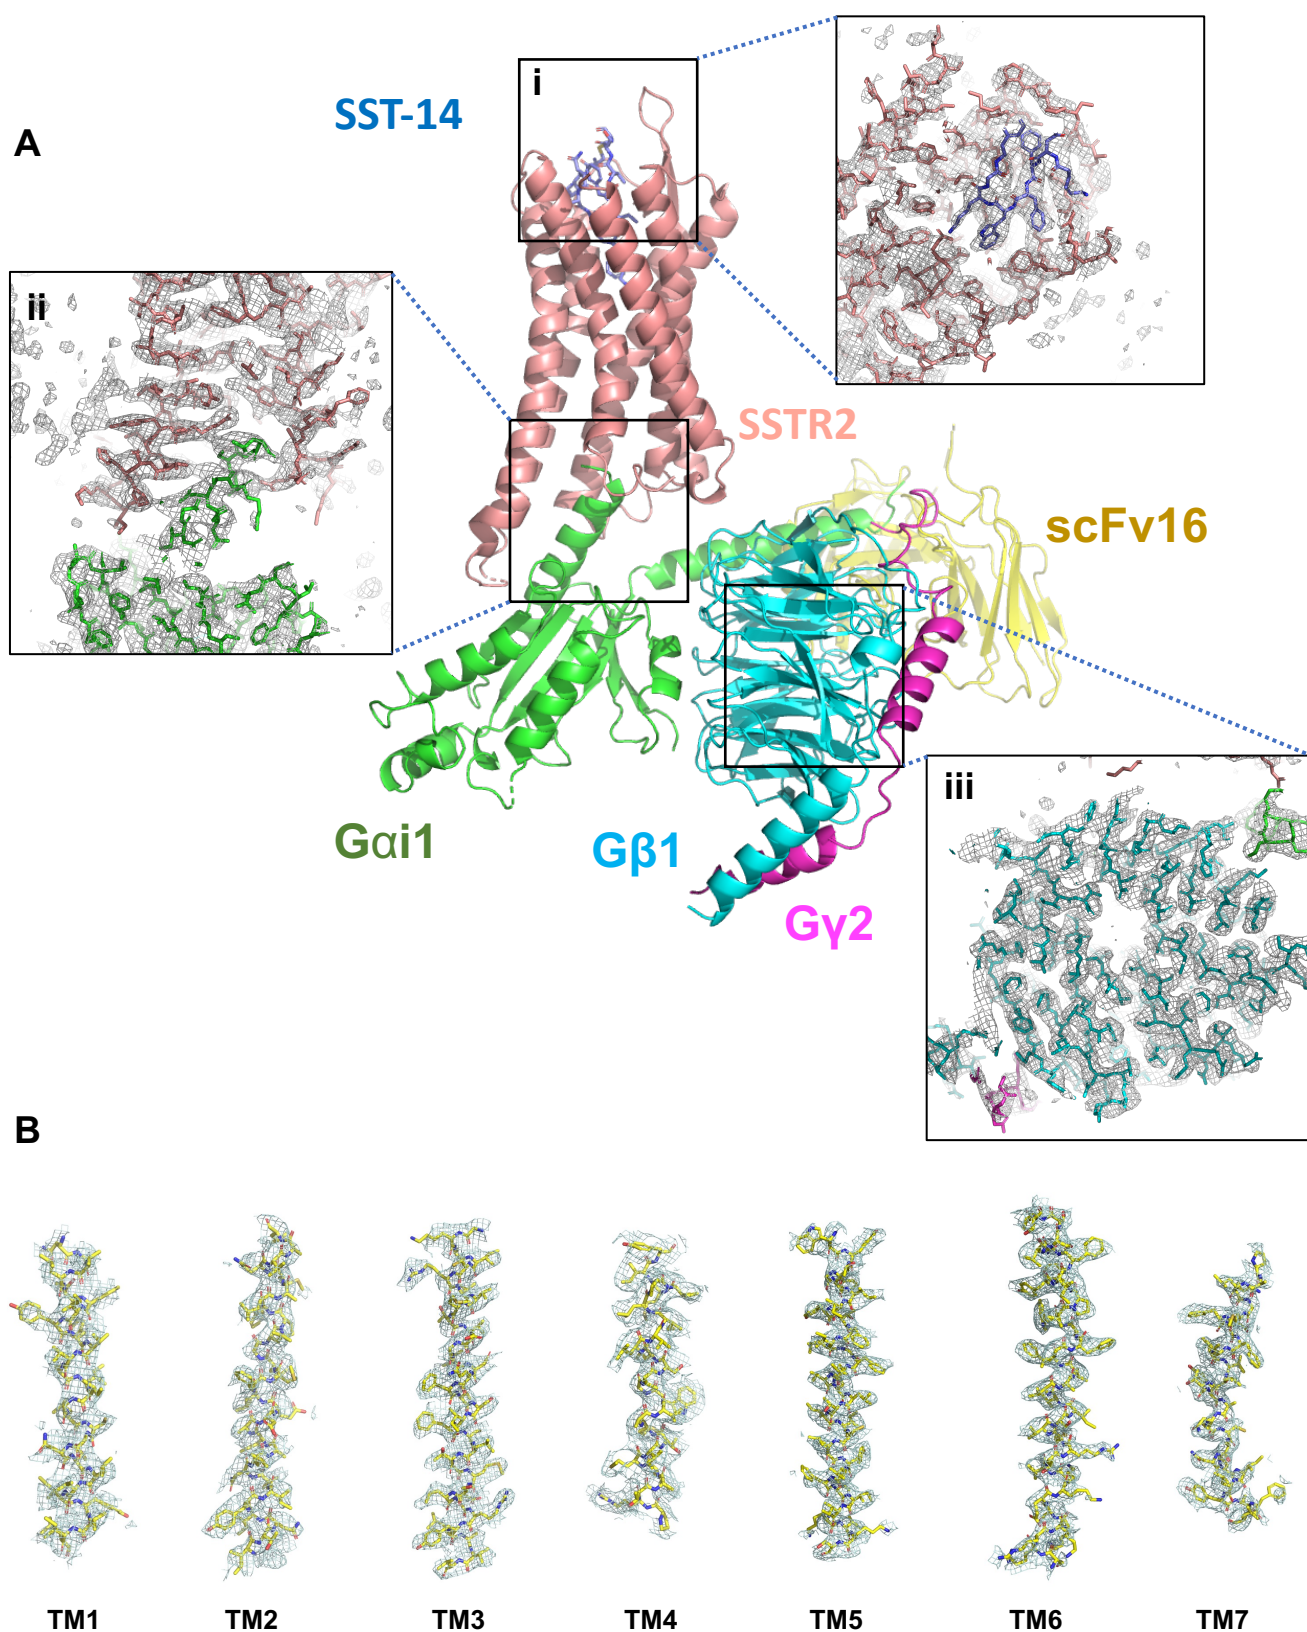

**Figure 1-figure supplement 3. Cryo-EM structure of SSTR2 complex**

**(A)** The cryo-EM maps of SSTR2 complex at the ligand binding pocket (i), the interface between SSTR2 and G-proteins (ii) and the G-protein (Gβ1) (iii).

**(B)** The atomic models of the seven transmembrane helices (TM1: 43–69 a.a., TM2: 77–105 a.a., TM3: 111–145 a.a., TM4: 156–180 a.a., TM5: 203–237 a.a., TM6: 245–281 a.a., and TM7: 288–315 a.a.) are superimposed on the cryo-EM map.
