# Supplementary material for: Cryo-EM structure of the human somatostatin receptor 2 complex with its agonist somatostatin delineates the ligand-binding specificity
Source: eLife journal article supplement (doi:10.7554/elife.76823), 2022-04-21
Supplement: supp [file elife-76823-supp-v1.zip]

Archive with 10 entries (10 files):
- elife_poa_e76823_Figure_1_figure_supplement_1.pdf
- elife_poa_e76823_Figure_1_figure_supplement_2.pdf
- elife_poa_e76823_Figure_1_figure_supplement_3.pdf
- elife_poa_e76823_Figure_1_figure_supplement_4.pdf
- elife_poa_e76823_Figure_1_figure_supplement_5.pdf
- elife_poa_e76823_Figure_2_figure_supplement_1.pdf
- elife_poa_e76823_Figure_3_figure_supplement_1.pdf
- elife_poa_e76823_Transparent_Reporting_File.pdf
- elife_poa_e76823_Figure_1_figure_supplement_1_source_data_1.zip
- elife_poa_e76823_Figure_2_figure_supplement_1_source_data_1.zip
