# Supplementary material for: Cryo-EM structure of the human somatostatin receptor 2 complex with its agonist somatostatin delineates the ligand-binding specificity
Source: eLife journal article supplement (doi:10.7554/elife.76823), 2022-04-21
Supplement: supp [file elife-76823-supp-v1.zip › elife_poa_e76823_Figure_1_figure_supplement_5.pdf]

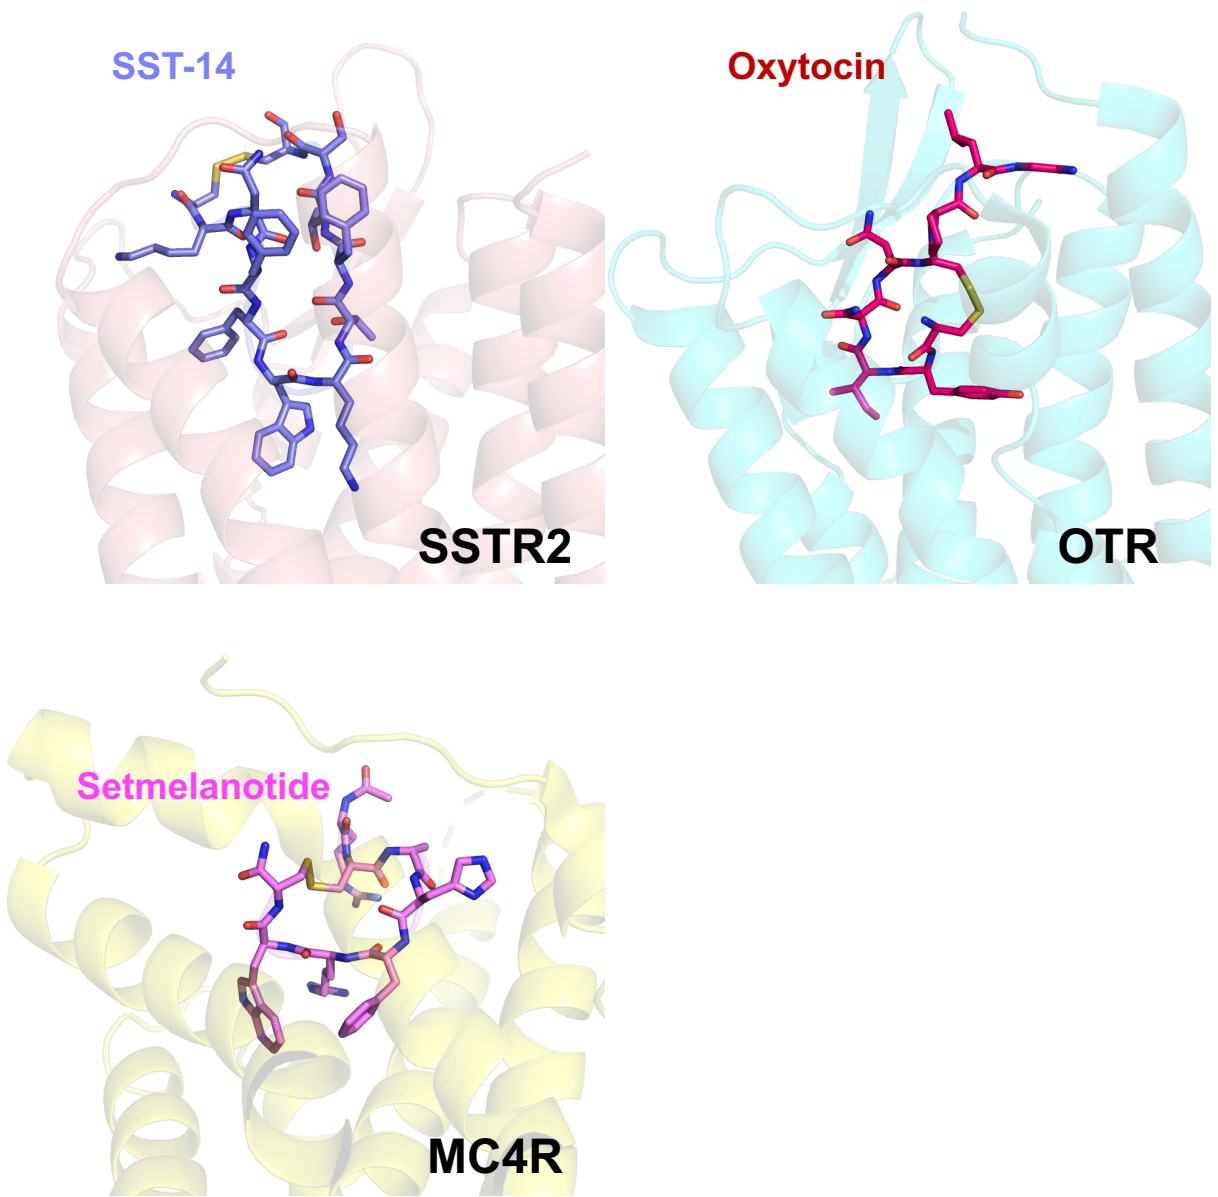

**Figure 1-figure supplement 5. The binding modes of cyclic peptide ligands of SSTR2, OTR and MC4R GPCR receptors.**

SST-14, oxytocin and setmelanotide cyclic peptide ligands bound to SSTR2, OTR and MC4R are shown in a stick model.
