# Supplementary material for: Cryo-EM structure of the human somatostatin receptor 2 complex with its agonist somatostatin delineates the ligand-binding specificity
Source: eLife journal article supplement (doi:10.7554/elife.76823), 2022-04-21
Supplement: supp [file elife-76823-supp-v1.zip › elife_poa_e76823_Figure_3_figure_supplement_1.pdf]

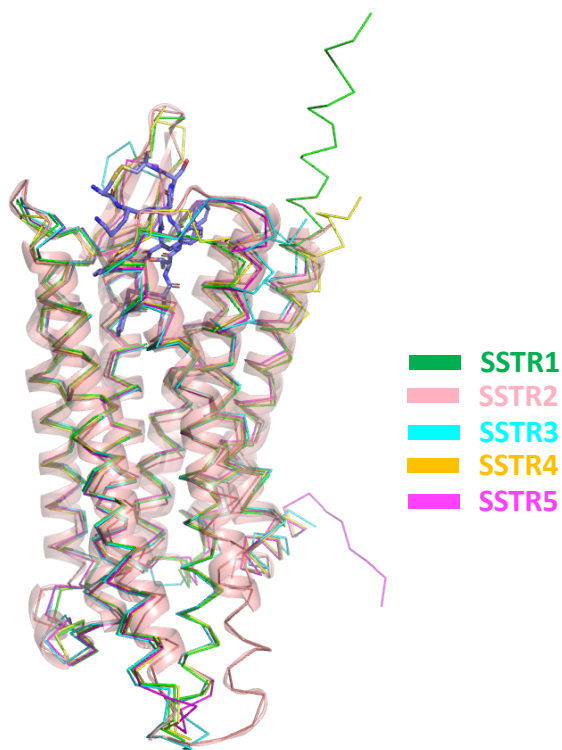

**Figure 3-figure supplement 1. AlphaFold Modeled Structures of SSTR isoforms.** Structures of SSTR1, 3, 4 and 5 from AlphaFold Protein Structure Database ([alphafold.ebi.ac.uk](https://alphafold.ebi.ac.uk)) were superimposed on the cryo-EM structure of SSTR2. SSTR2 is shown in a ribbon diagram in salmon color. SSTR1 is shown as a C $\alpha$  backbone model and colored in green, SSTR3 in cyan, SSTR4 in gold and SSTR5 in magenta.
