# Supplementary figures and images for: Cryo-EM structure of the human somatostatin receptor 2 complex with its agonist somatostatin delineates the ligand-binding specificity
Source: eLife journal article supplement (doi:10.7554/elife.76823), 2022-04-21

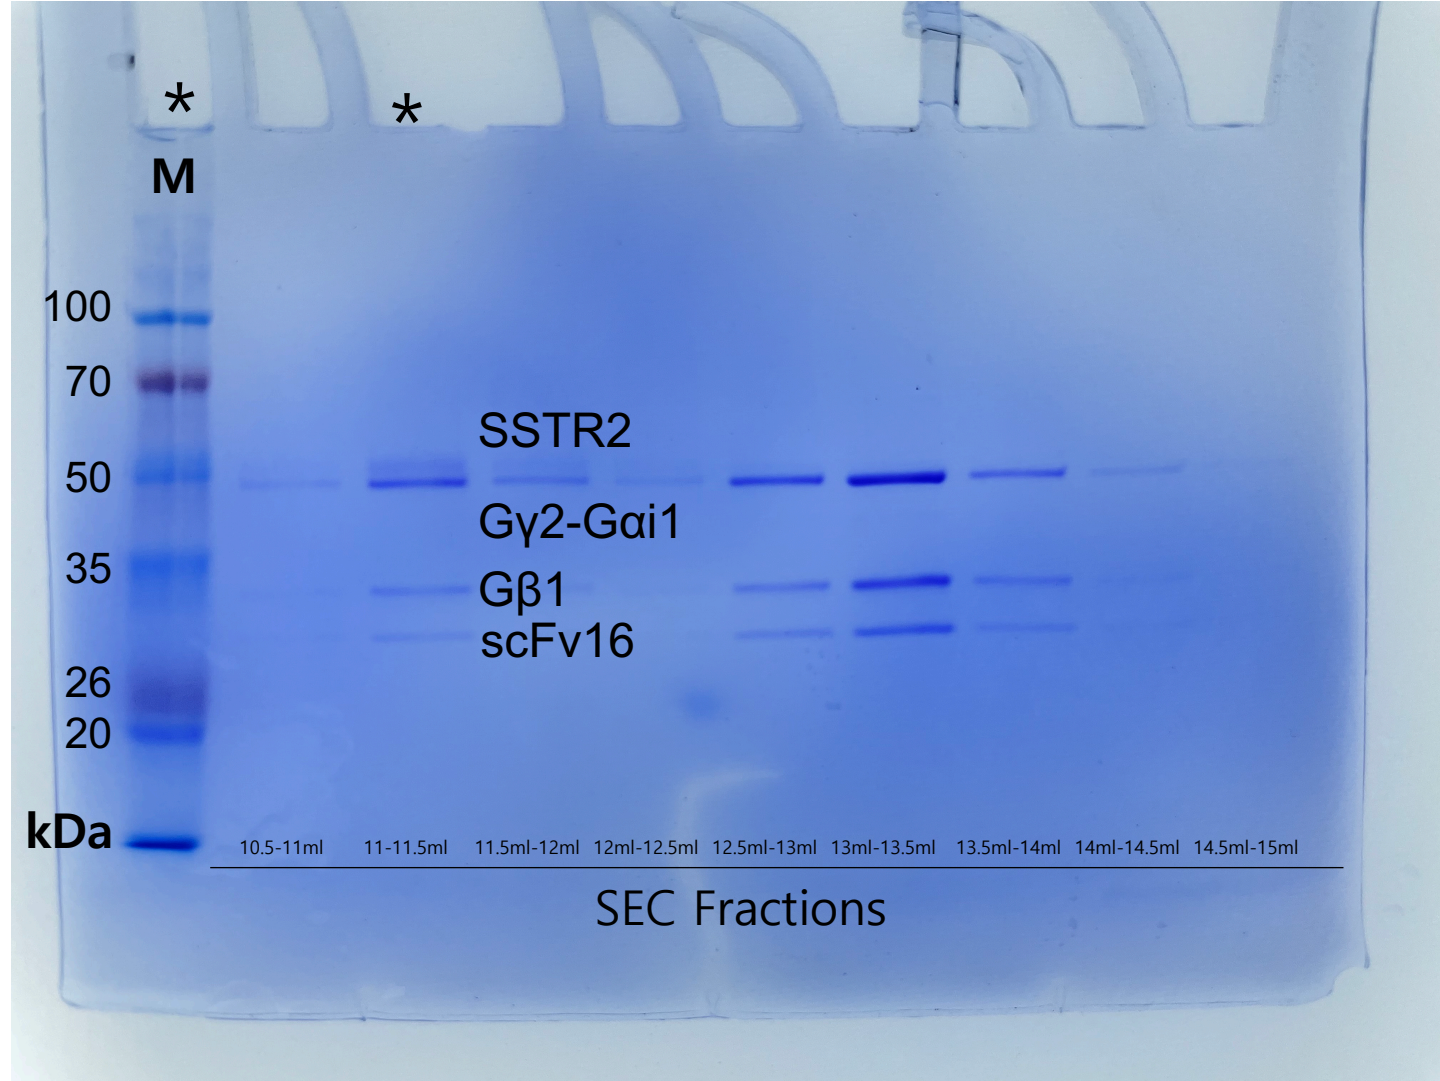

\*Lanes were used for Figure 1-figure Supplement 1

Supplement: supp [file elife-76823-supp-v1.zip]
